# Supplementary material for: New Azalomycin F Analogs from Mangrove Streptomyces sp. 211726 with Activity against Microbes and Cancer Cells
Source: MDPI journal article supplement (doi:10.3390/md11030817), 2013-03-12
Supplement: s2 [file s2]

marinedrugs-11-00817-s001.mol
  corina  04161405373D 1   1.00000     0.00000 
CORINA 3.49 0023  12.04.2013
 79 80  0  0  0  0  0  0  0  0999 V2000
   -4.7031   -0.7970    1.3111 C   0  0  0  0  0  0  0  0  0  0  0  0
   -4.1952   -2.2035    1.6358 C   0  0  0  0  0  0  0  0  0  0  0  0
   -5.1762   -2.8909    2.5873 C   0  0  0  0  0  0  0  0  0  0  0  0
   -4.2759    1.2773   -0.0187 C   0  0  0  0  0  0  0  0  0  0  0  0
   -3.7901   -0.1438    0.2715 C   0  0  0  0  0  0  0  0  0  0  0  0
   -3.7749    3.3197   -1.3752 C   0  0  0  0  0  0  0  0  0  0  0  0
   -3.5947    1.8029   -1.2838 C   0  0  0  0  0  0  0  0  0  0  0  0
   -1.8075    4.7223   -1.4308 O   0  0  0  0  0  0  0  0  0  0  0  0
   -2.6667    3.9175   -2.2427 C   0  0  0  0  0  0  0  0  0  0  0  0
    0.1510    6.1142   -1.1725 C   0  0  0  0  0  0  0  0  0  0  0  0
   -0.7155    5.3068   -2.1426 C   0  0  0  0  0  0  0  0  0  0  0  0
    2.1281    5.9044    0.3394 C   0  0  0  0  0  0  0  0  0  0  0  0
    1.4737    5.3818   -0.9408 C   0  0  0  0  0  0  0  0  0  0  0  0
    4.0376    5.6026    1.9233 C   0  0  0  0  0  0  0  0  0  0  0  0
    3.4198    5.1283    0.6067 C   0  0  0  0  0  0  0  0  0  0  0  0
    6.1950    3.0585    3.7014 C   0  0  0  0  0  0  0  0  0  0  0  0
    5.3663    4.3414    3.6236 C   0  0  0  0  0  0  0  0  0  0  0  0
    5.3404    4.8427    2.1781 C   0  0  0  0  0  0  0  0  0  0  0  0
    6.6255   -0.7403    6.6411 C   0  0  0  0  0  0  0  0  0  0  0  0
    6.9992    0.7197    6.6519 C   0  0  0  0  0  0  0  0  0  0  0  0
    7.0184    1.2506    5.2168 C   0  0  0  0  0  0  0  0  0  0  0  0
    6.1949    2.5381    5.1399 C   0  0  0  0  0  0  0  0  0  0  0  0
    5.0935   -2.5522    7.1317 C   0  0  0  0  0  0  0  0  0  0  0  0
    5.4549   -1.1349    7.1456 C   0  0  0  0  0  0  0  0  0  0  0  0
    3.5092   -4.3148    7.5083 C   0  0  0  0  0  0  0  0  0  0  0  0
    3.8601   -2.9417    7.5282 C   0  0  0  0  0  0  0  0  0  0  0  0
    1.4409   -5.0200    6.6106 C   0  0  0  0  0  0  0  0  0  0  0  0
    2.2360   -4.6939    7.7528 O   0  0  0  0  0  0  0  0  0  0  0  0
   -0.8488   -5.5473    5.8267 C   0  0  0  0  0  0  0  0  0  0  0  0
    0.0201   -5.3823    7.0469 C   0  0  0  0  0  0  0  0  0  0  0  0
   -2.7514   -4.9305    4.4541 C   0  0  0  0  0  0  0  0  0  0  0  0
   -1.9099   -4.7680    5.6519 C   0  0  0  0  0  0  0  0  0  0  0  0
   -4.6202   -4.2527    3.0085 C   0  0  0  0  0  0  0  0  0  0  0  0
   -3.7557   -4.0903    4.2310 C   0  0  0  0  0  0  0  0  0  0  0  0
    7.5369    3.3330    3.2942 O   0  0  0  0  0  0  0  0  0  0  0  0
   -2.2007    1.4917   -1.2372 O   0  0  0  0  0  0  0  0  0  0  0  0
   -2.0869    3.1152   -2.6985 H   0  0  0  0  0  0  0  0  0  0  0  0
    0.0734    4.2742   -2.7371 O   0  0  0  0  0  0  0  0  0  0  0  0
    1.2260    3.9804   -0.8114 O   0  0  0  0  0  0  0  0  0  0  0  0
    1.1679    5.7171    1.5158 C   0  0  0  0  0  0  0  0  0  0  0  0
    6.4510    5.7142    1.9565 O   0  0  0  0  0  0  0  0  0  0  0  0
    5.9929    5.4089    4.5229 C   0  0  0  0  0  0  0  0  0  0  0  0
    6.4567    0.2725    4.3394 O   0  0  0  0  0  0  0  0  0  0  0  0
    5.9724    1.5032    7.4721 C   0  0  0  0  0  0  0  0  0  0  0  0
    2.8603   -1.9143    7.9934 C   0  0  0  0  0  0  0  0  0  0  0  0
    4.3569   -5.1541    7.2699 O   0  0  0  0  0  0  0  0  0  0  0  0
    0.0467   -6.6928    7.8360 C   0  0  0  0  0  0  0  0  0  0  0  0
   -4.0271   -2.9704    5.2031 C   0  0  0  0  0  0  0  0  0  0  0  0
   -5.7026   -5.1373    3.3053 O   0  0  0  0  0  0  0  0  0  0  0  0
   -2.9114   -2.1150    2.2571 O   0  0  0  0  0  0  0  0  0  0  0  0
   -1.2541    6.2313   -3.2350 C   0  0  0  0  0  0  0  0  0  0  0  0
   -2.1780    5.4409   -4.1635 C   0  0  0  0  0  0  0  0  0  0  0  0
   -3.2886    4.7840   -3.3409 C   0  0  0  0  0  0  0  0  0  0  0  0
   -2.7571    6.3255   -5.1249 O   0  0  0  0  0  0  0  0  0  0  0  0
   -0.1631    6.7635   -3.9891 O   0  0  0  0  0  0  0  0  0  0  0  0
   -3.8168   -0.9233   -0.9532 O   0  0  0  0  0  0  0  0  0  0  0  0
   -2.9108   -1.9070   -1.0693 C   0  0  0  0  0  0  0  0  0  0  0  0
   -2.8780   -2.7582   -2.3124 C   0  0  0  0  0  0  0  0  0  0  0  0
   -1.7777   -3.7809   -2.1920 C   0  0  0  0  0  0  0  0  0  0  0  0
   -1.5609   -4.6539   -3.1883 O   0  0  0  0  0  0  0  0  0  0  0  0
   -2.1217   -2.1099   -0.1771 O   0  0  0  0  0  0  0  0  0  0  0  0
   -1.0906   -3.8150   -1.1987 O   0  0  0  0  0  0  0  0  0  0  0  0
    2.2446   -7.0858    2.1367 C   0  0  0  0  0  0  0  0  0  0  0  0
    2.6373   -7.0980    3.6154 C   0  0  0  0  0  0  0  0  0  0  0  0
    1.7602   -6.1078    4.3842 C   0  0  0  0  0  0  0  0  0  0  0  0
    2.0663   -6.2098    5.8798 C   0  0  0  0  0  0  0  0  0  0  0  0
    2.7350   -8.0640   -0.0886 C   0  0  0  0  0  0  0  0  0  0  0  0
    3.1218   -8.0760    1.3679 C   0  0  0  0  0  0  0  0  0  0  0  0
    3.2554   -7.8220   -2.4618 C   0  0  0  0  0  0  0  0  0  0  0  0
    3.6421   -7.8340   -1.0053 C   0  0  0  0  0  0  0  0  0  0  0  0
    3.2921   -6.4837   -4.5712 C   0  0  0  0  0  0  0  0  0  0  0  0
    3.6847   -6.4959   -3.0925 C   0  0  0  0  0  0  0  0  0  0  0  0
    3.4539   -4.9729   -6.5056 C   0  0  0  0  0  0  0  0  0  0  0  0
    3.7032   -5.2139   -5.1752 N   0  0  0  0  0  0  0  0  0  0  0  0
    3.8397   -3.7812   -7.0724 N   0  0  0  0  0  0  0  0  0  0  0  0
    2.8517   -5.8741   -7.2295 N   0  0  0  0  0  0  0  0  0  0  0  0
    2.6861   -5.6657   -8.6701 C   0  0  0  0  0  0  0  0  0  0  0  0
    4.6145   -2.8149   -6.2901 C   0  0  0  0  0  0  0  0  0  0  0  0
    2.0511   -4.6860    3.8998 C   0  0  0  0  0  0  0  0  0  0  0  0
  1  2  1  0      
  2  3  1  0      
  4  5  1  0      
  5  1  1  0      
  6  7  1  0      
  7  4  1  0      
  8  9  1  0      
  9  6  1  0      
 10 11  1  0      
 11  8  1  0      
 12 13  1  0      
 13 10  1  0      
 14 15  1  0      
 15 12  1  0      
 16 17  1  0      
 17 18  1  0      
 18 14  1  0      
 19 20  1  0      
 20 21  1  0      
 21 22  1  0      
 22 16  1  0      
 23 24  1  0      
 24 19  2  0      
 25 26  1  0      
 26 23  2  0      
 28 25  1  0      
 29 30  1  0      
 30 27  1  0      
 31 32  1  0      
 32 29  2  0      
  3 33  1  0      
 33 34  1  0      
 34 31  2  0      
 16 35  1  0      
  7 36  1  0      
  9 37  1  0      
 11 38  1  0      
 13 39  1  0      
 12 40  1  0      
 18 41  1  0      
 17 42  1  0      
 21 43  1  0      
 20 44  1  0      
 26 45  1  0      
 25 46  2  0      
 27 28  1  0      
 30 47  1  0      
 34 48  1  0      
 33 49  1  0      
  2 50  1  0      
 11 51  1  0      
 51 52  1  0      
 52 53  1  0      
 53  9  1  0      
 52 54  1  0      
 51 55  1  0      
  5 56  1  0      
 56 57  1  0      
 57 58  1  0      
 58 59  1  0      
 59 60  1  0      
 57 61  2  0      
 59 62  2  0      
 63 64  1  0      
 64 65  1  0      
 65 66  1  0      
 27 66  1  0      
 67 68  1  0      
 68 63  1  0      
 69 70  1  0      
 70 67  2  0      
 71 72  1  0      
 72 69  1  0      
 73 74  1  0      
 74 71  1  0      
 73 75  1  0      
 73 76  2  0      
 76 77  1  0      
 75 78  1  0      
 65 79  1  0      
M  END
$$$$
