# Supplementary material for: New Azalomycin F Analogs from Mangrove Streptomyces sp. 211726 with Activity against Microbes and Cancer Cells
Source: MDPI journal article supplement (doi:10.3390/md11030817), 2013-03-12
Supplement: s3 [file s3]

marinedrugs-11-00817-s001.mol
  ChemDraw03251423372D

 79 80  0  0  0  0  0  0  0  0999 V2000
   -4.2847    1.7428    0.0000 C   0  0  0  0  0  0  0  0  0  0  0  0
   -4.2847    0.9178    0.0000 C   0  0  0  0  0  0  0  0  0  0  0  0
   -3.5702    0.5053    0.0000 C   0  0  0  0  0  0  0  0  0  0  0  0
   -2.8558    1.7428    0.0000 C   0  0  0  0  0  0  0  0  0  0  0  0
   -3.5702    2.1553    0.0000 C   0  0  0  0  0  0  0  0  0  0  0  0
   -1.4268    1.7428    0.0000 C   0  0  0  0  0  0  0  0  0  0  0  0
   -2.1413    2.1553    0.0000 C   0  0  0  0  0  0  0  0  0  0  0  0
    0.0021    1.7428    0.0000 O   0  0  0  0  0  0  0  0  0  0  0  0
   -0.7124    2.1553    0.0000 C   0  0  0  0  0  0  0  0  0  0  0  0
    1.4311    1.7428    0.0000 C   0  0  0  0  0  0  0  0  0  0  0  0
    0.7166    2.1553    0.0000 C   0  0  0  0  0  0  0  0  0  0  0  0
    2.8600    1.7428    0.0000 C   0  0  0  0  0  0  0  0  0  0  0  0
    2.1455    2.1553    0.0000 C   0  0  0  0  0  0  0  0  0  0  0  0
    4.2889    1.7428    0.0000 C   0  0  0  0  0  0  0  0  0  0  0  0
    3.5745    2.1553    0.0000 C   0  0  0  0  0  0  0  0  0  0  0  0
    5.7179    0.9178    0.0000 C   0  0  0  0  0  0  0  0  0  0  0  0
    5.7179    1.7428    0.0000 C   0  0  0  0  0  0  0  0  0  0  0  0
    5.0034    2.1553    0.0000 C   0  0  0  0  0  0  0  0  0  0  0  0
    5.0034   -0.3197    0.0000 C   0  0  0  0  0  0  0  0  0  0  0  0
    5.7179   -0.7322    0.0000 C   0  0  0  0  0  0  0  0  0  0  0  0
    6.4324   -0.3197    0.0000 C   0  0  0  0  0  0  0  0  0  0  0  0
    6.4324    0.5053    0.0000 C   0  0  0  0  0  0  0  0  0  0  0  0
    3.5745   -0.3197    0.0000 C   0  0  0  0  0  0  0  0  0  0  0  0
    4.2889   -0.7322    0.0000 C   0  0  0  0  0  0  0  0  0  0  0  0
    2.1455   -0.3197    0.0000 C   0  0  0  0  0  0  0  0  0  0  0  0
    2.8600   -0.7322    0.0000 C   0  0  0  0  0  0  0  0  0  0  0  0
    0.7166   -0.3197    0.0000 C   0  0  0  0  0  0  0  0  0  0  0  0
    1.4311   -0.7322    0.0000 O   0  0  0  0  0  0  0  0  0  0  0  0
   -0.7124   -0.3197    0.0000 C   0  0  0  0  0  0  0  0  0  0  0  0
    0.0021   -0.7322    0.0000 C   0  0  0  0  0  0  0  0  0  0  0  0
   -2.1413   -0.3197    0.0000 C   0  0  0  0  0  0  0  0  0  0  0  0
   -1.4268   -0.7322    0.0000 C   0  0  0  0  0  0  0  0  0  0  0  0
   -3.5702   -0.3197    0.0000 C   0  0  0  0  0  0  0  0  0  0  0  0
   -2.8558   -0.7322    0.0000 C   0  0  0  0  0  0  0  0  0  0  0  0
    5.0034    0.5053    0.0000 O   0  0  0  0  0  0  0  0  0  0  0  0
   -2.1413    2.9803    0.0000 O   0  0  0  0  0  0  0  0  0  0  0  0
   -0.7124    1.3303    0.0000 H   0  0  0  0  0  0  0  0  0  0  0  0
    0.7166    1.3303    0.0000 O   0  0  0  0  0  0  0  0  0  0  0  0
    2.1455    2.9803    0.0000 O   0  0  0  0  0  0  0  0  0  0  0  0
    2.8600    0.9178    0.0000 C   0  0  0  0  0  0  0  0  0  0  0  0
    5.0034    2.9803    0.0000 O   0  0  0  0  0  0  0  0  0  0  0  0
    6.4324    2.1553    0.0000 C   0  0  0  0  0  0  0  0  0  0  0  0
    7.1468   -0.7322    0.0000 O   0  0  0  0  0  0  0  0  0  0  0  0
    5.7179   -1.5572    0.0000 C   0  0  0  0  0  0  0  0  0  0  0  0
    2.8600   -1.5572    0.0000 C   0  0  0  0  0  0  0  0  0  0  0  0
    2.1455    0.5053    0.0000 O   0  0  0  0  0  0  0  0  0  0  0  0
    0.0021   -1.5572    0.0000 C   0  0  0  0  0  0  0  0  0  0  0  0
   -2.8558   -1.5572    0.0000 C   0  0  0  0  0  0  0  0  0  0  0  0
   -4.1536   -0.9031    0.0000 O   0  0  0  0  0  0  0  0  0  0  0  0
   -4.8681    0.3344    0.0000 O   0  0  0  0  0  0  0  0  0  0  0  0
    0.7166    2.9803    0.0000 C   0  0  0  0  0  0  0  0  0  0  0  0
    0.0021    3.3928    0.0000 C   0  0  0  0  0  0  0  0  0  0  0  0
   -0.7124    2.9803    0.0000 C   0  0  0  0  0  0  0  0  0  0  0  0
    0.0021    4.2178    0.0000 O   0  0  0  0  0  0  0  0  0  0  0  0
    1.4311    3.3928    0.0000 O   0  0  0  0  0  0  0  0  0  0  0  0
   -3.5702    2.9803    0.0000 O   0  0  0  0  0  0  0  0  0  0  0  0
   -4.2847    3.3928    0.0000 C   0  0  0  0  0  0  0  0  0  0  0  0
   -4.9992    2.9803    0.0000 C   0  0  0  0  0  0  0  0  0  0  0  0
   -5.7137    3.3928    0.0000 C   0  0  0  0  0  0  0  0  0  0  0  0
   -6.4281    2.9803    0.0000 O   0  0  0  0  0  0  0  0  0  0  0  0
   -4.2847    4.2178    0.0000 O   0  0  0  0  0  0  0  0  0  0  0  0
   -5.7137    4.2178    0.0000 O   0  0  0  0  0  0  0  0  0  0  0  0
   -0.7166   -2.9803    0.0000 C   0  0  0  0  0  0  0  0  0  0  0  0
   -0.0021   -3.3928    0.0000 C   0  0  0  0  0  0  0  0  0  0  0  0
    0.7124   -2.9803    0.0000 C   0  0  0  0  0  0  0  0  0  0  0  0
    0.7124   -2.1553    0.0000 C   0  0  0  0  0  0  0  0  0  0  0  0
   -2.1455   -2.9803    0.0000 C   0  0  0  0  0  0  0  0  0  0  0  0
   -1.4311   -3.3928    0.0000 C   0  0  0  0  0  0  0  0  0  0  0  0
   -3.5745   -2.9803    0.0000 C   0  0  0  0  0  0  0  0  0  0  0  0
   -2.8600   -3.3928    0.0000 C   0  0  0  0  0  0  0  0  0  0  0  0
   -5.0034   -2.9803    0.0000 C   0  0  0  0  0  0  0  0  0  0  0  0
   -4.2889   -3.3928    0.0000 C   0  0  0  0  0  0  0  0  0  0  0  0
   -6.4324   -2.9803    0.0000 C   0  0  0  0  0  0  0  0  0  0  0  0
   -5.7179   -3.3928    0.0000 N   0  0  0  0  0  0  0  0  0  0  0  0
   -7.1468   -3.3928    0.0000 N   0  0  0  0  0  0  0  0  0  0  0  0
   -6.4324   -2.1553    0.0000 N   0  0  0  0  0  0  0  0  0  0  0  0
   -7.1468   -1.7428    0.0000 C   0  0  0  0  0  0  0  0  0  0  0  0
   -7.1468   -4.2178    0.0000 C   0  0  0  0  0  0  0  0  0  0  0  0
    1.4268   -3.3928    0.0000 C   0  0  0  0  0  0  0  0  0  0  0  0
  1  2  1  0      
  2  3  1  0      
  4  5  1  0      
  5  1  1  0      
  6  7  1  0      
  7  4  1  0      
  8  9  1  0      
  9  6  1  0      
 10 11  1  0      
 11  8  1  0      
 12 13  1  0      
 13 10  1  0      
 14 15  1  0      
 15 12  1  0      
 16 17  1  0      
 17 18  1  0      
 18 14  1  0      
 19 20  1  0      
 20 21  1  0      
 21 22  1  0      
 22 16  1  0      
 23 24  1  0      
 24 19  2  0      
 25 26  1  0      
 26 23  2  0      
 28 25  1  0      
 29 30  1  0      
 30 27  1  0      
 31 32  1  0      
 32 29  2  0      
  3 33  1  0      
 33 34  1  0      
 34 31  2  0      
 16 35  1  6      
  7 36  1  6      
  9 37  1  6      
 11 38  1  6      
 13 39  1  6      
 12 40  1  6      
 18 41  1  1      
 17 42  1  6      
 21 43  1  6      
 20 44  1  1      
 26 45  1  0      
 25 46  2  0      
 27 28  1  1      
 30 47  1  6      
 34 48  1  0      
 33 49  1  1      
  2 50  1  6      
 11 51  1  0      
 51 52  1  0      
 52 53  1  0      
 53  9  1  0      
 52 54  1  1      
 51 55  1  6      
  5 56  1  1      
 56 57  1  0      
 57 58  1  0      
 58 59  1  0      
 59 60  1  0      
 57 61  2  0      
 59 62  2  0      
 63 64  1  0      
 64 65  1  0      
 65 66  1  0      
 27 66  1  0      
 67 68  1  0      
 68 63  1  0      
 69 70  1  0      
 70 67  2  0      
 71 72  1  0      
 72 69  1  0      
 73 74  1  0      
 74 71  1  0      
 73 75  1  0      
 73 76  2  0      
 76 77  1  0      
 75 78  1  0      
 65 79  1  1      
M  END
