# Supplementary material for: New Azalomycin F Analogs from Mangrove Streptomyces sp. 211726 with Activity against Microbes and Cancer Cells
Source: MDPI journal article supplement (doi:10.3390/md11030817), 2013-03-12
Supplement: s4 [file s4]

marinedrugs-11-00817-s002.mol
  corina  04161405373D 1   1.00000     0.00000 
CORINA 3.49 0023  12.04.2013
 80 81  0  0  0  0  0  0  0  0999 V2000
   -3.4855   -0.5411    0.8567 C   0  0  0  0  0  0  0  0  0  0  0  0
   -3.2049   -1.9219    1.4534 C   0  0  0  0  0  0  0  0  0  0  0  0
   -4.4551   -2.4267    2.1763 C   0  0  0  0  0  0  0  0  0  0  0  0
   -2.5478    1.3210   -0.5244 C   0  0  0  0  0  0  0  0  0  0  0  0
   -2.2809   -0.0774    0.0351 C   0  0  0  0  0  0  0  0  0  0  0  0
   -1.5352    3.1438   -1.9078 C   0  0  0  0  0  0  0  0  0  0  0  0
   -1.5193    1.6429   -1.6102 C   0  0  0  0  0  0  0  0  0  0  0  0
    0.4957    4.4138   -1.5856 O   0  0  0  0  0  0  0  0  0  0  0  0
   -0.1923    3.5633   -2.5067 C   0  0  0  0  0  0  0  0  0  0  0  0
    2.4361    5.7133   -0.9640 C   0  0  0  0  0  0  0  0  0  0  0  0
    1.7817    4.8405   -2.0382 C   0  0  0  0  0  0  0  0  0  0  0  0
    3.9290    5.5837    1.0342 C   0  0  0  0  0  0  0  0  0  0  0  0
    3.5840    4.9418   -0.3108 C   0  0  0  0  0  0  0  0  0  0  0  0
    5.3302    5.3760    3.0932 C   0  0  0  0  0  0  0  0  0  0  0  0
    5.0341    4.7752    1.7179 C   0  0  0  0  0  0  0  0  0  0  0  0
    6.7218    2.9579    5.6438 C   0  0  0  0  0  0  0  0  0  0  0  0
    6.0579    4.2659    5.2111 C   0  0  0  0  0  0  0  0  0  0  0  0
    6.4507    4.5813    3.7662 C   0  0  0  0  0  0  0  0  0  0  0  0
    6.0414   -0.4576    8.9798 C   0  0  0  0  0  0  0  0  0  0  0  0
    6.5270    0.9684    8.9340 C   0  0  0  0  0  0  0  0  0  0  0  0
    6.9629    1.3119    7.5080 C   0  0  0  0  0  0  0  0  0  0  0  0
    6.3042    2.6242    7.0770 C   0  0  0  0  0  0  0  0  0  0  0  0
    4.2808   -2.1028    9.2340 C   0  0  0  0  0  0  0  0  0  0  0  0
    4.7500   -0.7180    9.1926 C   0  0  0  0  0  0  0  0  0  0  0  0
    2.5038   -3.7105    9.3600 C   0  0  0  0  0  0  0  0  0  0  0  0
    2.9574   -2.3682    9.3261 C   0  0  0  0  0  0  0  0  0  0  0  0
    0.6836   -4.4044    8.0234 C   0  0  0  0  0  0  0  0  0  0  0  0
    1.1824   -3.9825    9.2948 O   0  0  0  0  0  0  0  0  0  0  0  0
   -1.3632   -4.8951    6.7176 C   0  0  0  0  0  0  0  0  0  0  0  0
   -0.8279   -4.6271    8.1007 C   0  0  0  0  0  0  0  0  0  0  0  0
   -2.7846   -4.3491    4.8293 C   0  0  0  0  0  0  0  0  0  0  0  0
   -2.2701   -4.0849    6.1838 C   0  0  0  0  0  0  0  0  0  0  0  0
   -4.1492   -3.7539    2.8734 C   0  0  0  0  0  0  0  0  0  0  0  0
   -3.6189   -3.4880    4.2578 C   0  0  0  0  0  0  0  0  0  0  0  0
    8.1422    3.1019    5.5826 O   0  0  0  0  0  0  0  0  0  0  0  0
    0.4124    2.6780   -2.7029 H   0  0  0  0  0  0  0  0  0  0  0  0
    2.6030    3.6979   -2.2868 O   0  0  0  0  0  0  0  0  0  0  0  0
    3.1885    3.5844   -0.1034 O   0  0  0  0  0  0  0  0  0  0  0  0
    2.6849    5.6015    1.9247 C   0  0  0  0  0  0  0  0  0  0  0  0
    7.6533    5.3532    3.7574 O   0  0  0  0  0  0  0  0  0  0  0  0
    6.5228    5.4009    6.1257 C   0  0  0  0  0  0  0  0  0  0  0  0
    6.5629    0.2644    6.6220 O   0  0  0  0  0  0  0  0  0  0  0  0
    5.3964    1.9064    9.3618 C   0  0  0  0  0  0  0  0  0  0  0  0
    1.9662   -1.2350    9.3952 C   0  0  0  0  0  0  0  0  0  0  0  0
    3.3068   -4.6201    9.4475 O   0  0  0  0  0  0  0  0  0  0  0  0
   -1.1219   -5.8269    9.0034 C   0  0  0  0  0  0  0  0  0  0  0  0
   -4.0322   -2.2406    4.9968 C   0  0  0  0  0  0  0  0  0  0  0  0
   -5.3452   -4.5307    2.9632 O   0  0  0  0  0  0  0  0  0  0  0  0
   -2.1224   -1.8290    2.3817 O   0  0  0  0  0  0  0  0  0  0  0  0
    1.6274    5.6489   -3.3270 C   0  0  0  0  0  0  0  0  0  0  0  0
    0.9086    4.8016   -4.3785 C   0  0  0  0  0  0  0  0  0  0  0  0
   -0.4303    4.3182   -3.8170 C   0  0  0  0  0  0  0  0  0  0  0  0
    0.6779    5.5892   -5.5483 O   0  0  0  0  0  0  0  0  0  0  0  0
    2.9187    6.0186   -3.8148 O   0  0  0  0  0  0  0  0  0  0  0  0
   -2.0626   -0.9879   -1.0445 O   0  0  0  0  0  0  0  0  0  0  0  0
    1.8553   -7.3367    4.1634 C   0  0  0  0  0  0  0  0  0  0  0  0
    1.9271   -7.1929    5.6850 C   0  0  0  0  0  0  0  0  0  0  0  0
    1.4146   -5.8097    6.0912 C   0  0  0  0  0  0  0  0  0  0  0  0
    1.3690   -5.7107    7.6173 C   0  0  0  0  0  0  0  0  0  0  0  0
    2.2970   -8.8617    2.2586 C   0  0  0  0  0  0  0  0  0  0  0  0
    2.3677   -8.7199    3.7572 C   0  0  0  0  0  0  0  0  0  0  0  0
    3.2990   -9.3267    0.0812 C   0  0  0  0  0  0  0  0  0  0  0  0
    3.3698   -9.1850    1.5798 C   0  0  0  0  0  0  0  0  0  0  0  0
    4.2765   -8.5650   -2.0883 C   0  0  0  0  0  0  0  0  0  0  0  0
    4.3483   -8.4212   -0.5668 C   0  0  0  0  0  0  0  0  0  0  0  0
    5.4046   -7.6590   -4.0776 C   0  0  0  0  0  0  0  0  0  0  0  0
    5.2812   -7.6980   -2.7088 N   0  0  0  0  0  0  0  0  0  0  0  0
    6.3475   -6.8453   -4.6599 N   0  0  0  0  0  0  0  0  0  0  0  0
    4.6278   -8.3935   -4.8231 N   0  0  0  0  0  0  0  0  0  0  0  0
    4.8281   -8.4326   -6.2739 C   0  0  0  0  0  0  0  0  0  0  0  0
    7.2562   -6.0601   -3.8208 C   0  0  0  0  0  0  0  0  0  0  0  0
    2.3533   -4.7354    5.5383 C   0  0  0  0  0  0  0  0  0  0  0  0
    1.8765   -0.0320   -1.5276 C   0  0  0  0  0  0  0  0  0  0  0  0
    2.5928   -0.5395   -2.7055 N   0  0  0  0  0  0  0  0  0  0  0  0
   -0.1969    1.2551   -1.1531 O   0  0  0  0  0  0  0  0  0  0  0  0
    0.4924    0.4062   -1.9317 C   0  0  0  0  0  0  0  0  0  0  0  0
    1.7744   -1.1392   -0.4766 C   0  0  0  0  0  0  0  0  0  0  0  0
    1.1241   -2.3758   -1.1000 C   0  0  0  0  0  0  0  0  0  0  0  0
    0.0031   -0.0065   -2.9564 O   0  0  0  0  0  0  0  0  0  0  0  0
    3.1749   -1.4973    0.0246 C   0  0  0  0  0  0  0  0  0  0  0  0
  1  2  1  0      
  2  3  1  0      
  4  5  1  0      
  5  1  1  0      
  6  7  1  0      
  7  4  1  0      
  8  9  1  0      
  9  6  1  0      
 10 11  1  0      
 11  8  1  0      
 12 13  1  0      
 13 10  1  0      
 14 15  1  0      
 15 12  1  0      
 16 17  1  0      
 17 18  1  0      
 18 14  1  0      
 19 20  1  0      
 20 21  1  0      
 21 22  1  0      
 22 16  1  0      
 23 24  1  0      
 24 19  2  0      
 25 26  1  0      
 26 23  2  0      
 28 25  1  0      
 29 30  1  0      
 30 27  1  0      
 31 32  1  0      
 32 29  2  0      
  3 33  1  0      
 33 34  1  0      
 34 31  2  0      
 16 35  1  0      
  9 36  1  0      
 11 37  1  0      
 13 38  1  0      
 12 39  1  0      
 18 40  1  0      
 17 41  1  0      
 21 42  1  0      
 20 43  1  0      
 26 44  1  0      
 25 45  2  0      
 27 28  1  0      
 30 46  1  0      
 34 47  1  0      
 33 48  1  0      
  2 49  1  0      
 11 50  1  0      
 50 51  1  0      
 51 52  1  0      
 52  9  1  0      
 51 53  1  0      
 50 54  1  0      
  5 55  1  0      
 56 57  1  0      
 57 58  1  0      
 58 59  1  0      
 27 59  1  0      
 60 61  1  0      
 61 56  1  0      
 62 63  1  0      
 63 60  2  0      
 64 65  1  0      
 65 62  1  0      
 66 67  1  0      
 67 64  1  0      
 66 68  1  0      
 66 69  2  0      
 69 70  1  0      
 68 71  1  0      
 58 72  1  0      
 73 74  1  0      
 75 76  1  0      
 76 73  1  0      
 73 77  1  0      
 77 78  1  0      
  7 75  1  0      
 76 79  2  0      
 77 80  1  0      
M  END
$$$$
