# Supplementary material for: New Azalomycin F Analogs from Mangrove Streptomyces sp. 211726 with Activity against Microbes and Cancer Cells
Source: MDPI journal article supplement (doi:10.3390/md11030817), 2013-03-12
Supplement: s6 [file s6]

marinedrugs-11-00817-s003.mol
  corina  04161405383D 1   1.00000     0.00000 
CORINA 3.49 0023  12.04.2013
 82 83  0  0  0  0  0  0  0  0999 V2000
   -3.8944   -0.6169    0.1183 C   0  0  0  0  0  0  0  0  0  0  0  0
   -3.6815   -1.9861    0.7673 C   0  0  0  0  0  0  0  0  0  0  0  0
   -5.0003   -2.4731    1.3705 C   0  0  0  0  0  0  0  0  0  0  0  0
   -2.8143    1.2148   -1.1980 C   0  0  0  0  0  0  0  0  0  0  0  0
   -2.6113   -0.1728   -0.5871 C   0  0  0  0  0  0  0  0  0  0  0  0
   -1.6595    3.0069   -2.5082 C   0  0  0  0  0  0  0  0  0  0  0  0
   -1.6804    1.5122   -2.1810 C   0  0  0  0  0  0  0  0  0  0  0  0
    0.3345    4.2780   -2.0084 O   0  0  0  0  0  0  0  0  0  0  0  0
   -0.2613    3.4109   -2.9770 C   0  0  0  0  0  0  0  0  0  0  0  0
    2.2083    5.5849   -1.2205 C   0  0  0  0  0  0  0  0  0  0  0  0
    1.6613    4.6923   -2.3376 C   0  0  0  0  0  0  0  0  0  0  0  0
    3.4921    5.4917    0.9200 C   0  0  0  0  0  0  0  0  0  0  0  0
    3.2813    4.8238   -0.4400 C   0  0  0  0  0  0  0  0  0  0  0  0
    4.6783    5.3218    3.1132 C   0  0  0  0  0  0  0  0  0  0  0  0
    4.5192    4.6943    1.7272 C   0  0  0  0  0  0  0  0  0  0  0  0
    5.7955    2.9520    5.8380 C   0  0  0  0  0  0  0  0  0  0  0  0
    5.1844    4.2527    5.3150 C   0  0  0  0  0  0  0  0  0  0  0  0
    5.7219    4.5380    3.9110 C   0  0  0  0  0  0  0  0  0  0  0  0
    4.7677   -0.3941    9.1553 C   0  0  0  0  0  0  0  0  0  0  0  0
    5.2618    1.0294    9.1306 C   0  0  0  0  0  0  0  0  0  0  0  0
    5.8405    1.3431    7.7491 C   0  0  0  0  0  0  0  0  0  0  0  0
    5.2344    2.6481    7.2283 C   0  0  0  0  0  0  0  0  0  0  0  0
    2.9830   -2.0295    9.2636 C   0  0  0  0  0  0  0  0  0  0  0  0
    3.4603   -0.6470    9.2423 C   0  0  0  0  0  0  0  0  0  0  0  0
    1.1952   -3.6299    9.2418 C   0  0  0  0  0  0  0  0  0  0  0  0
    1.6559   -2.2897    9.2273 C   0  0  0  0  0  0  0  0  0  0  0  0
   -0.4845   -4.3459    7.7428 C   0  0  0  0  0  0  0  0  0  0  0  0
   -0.1142   -3.8998    9.0494 O   0  0  0  0  0  0  0  0  0  0  0  0
   -2.3918   -4.8577    6.2477 C   0  0  0  0  0  0  0  0  0  0  0  0
   -1.9971   -4.5633    7.6720 C   0  0  0  0  0  0  0  0  0  0  0  0
   -3.6137   -4.3461    4.2155 C   0  0  0  0  0  0  0  0  0  0  0  0
   -3.2368   -4.0561    5.6094 C   0  0  0  0  0  0  0  0  0  0  0  0
   -4.7720   -3.7869    2.1209 C   0  0  0  0  0  0  0  0  0  0  0  0
   -4.3825   -3.4946    3.5461 C   0  0  0  0  0  0  0  0  0  0  0  0
    7.2155    3.0911    5.9173 O   0  0  0  0  0  0  0  0  0  0  0  0
    0.3561    2.5204   -3.0939 H   0  0  0  0  0  0  0  0  0  0  0  0
    2.4983    3.5429   -2.4798 O   0  0  0  0  0  0  0  0  0  0  0  0
    2.8608    3.4718   -0.2467 O   0  0  0  0  0  0  0  0  0  0  0  0
    2.1649    5.5304    1.6802 C   0  0  0  0  0  0  0  0  0  0  0  0
    6.9227    5.3066    4.0081 O   0  0  0  0  0  0  0  0  0  0  0  0
    5.5600    5.4046    6.2492 C   0  0  0  0  0  0  0  0  0  0  0  0
    5.5269    0.2791    6.8482 O   0  0  0  0  0  0  0  0  0  0  0  0
    4.0983    1.9786    9.4239 C   0  0  0  0  0  0  0  0  0  0  0  0
    0.6679   -1.1528    9.1739 C   0  0  0  0  0  0  0  0  0  0  0  0
    1.9812   -4.5396    9.4276 O   0  0  0  0  0  0  0  0  0  0  0  0
   -2.3858   -5.7439    8.5641 C   0  0  0  0  0  0  0  0  0  0  0  0
   -4.8623   -2.2316    4.2150 C   0  0  0  0  0  0  0  0  0  0  0  0
   -5.9745   -4.5588    2.1052 O   0  0  0  0  0  0  0  0  0  0  0  0
   -2.6975   -1.8773    1.7978 O   0  0  0  0  0  0  0  0  0  0  0  0
    1.6410    5.4751   -3.6511 C   0  0  0  0  0  0  0  0  0  0  0  0
    1.0277    4.6086   -4.7527 C   0  0  0  0  0  0  0  0  0  0  0  0
   -0.3630    4.1399   -4.3194 C   0  0  0  0  0  0  0  0  0  0  0  0
    0.9194    5.3732   -5.9551 O   0  0  0  0  0  0  0  0  0  0  0  0
    2.9764    5.8316   -4.0137 O   0  0  0  0  0  0  0  0  0  0  0  0
   -2.2897   -1.1053   -1.6210 O   0  0  0  0  0  0  0  0  0  0  0  0
    0.9953   -7.3942    4.0830 C   0  0  0  0  0  0  0  0  0  0  0  0
    0.9487   -7.2003    5.6000 C   0  0  0  0  0  0  0  0  0  0  0  0
    0.3960   -5.8099    5.9196 C   0  0  0  0  0  0  0  0  0  0  0  0
    0.2323   -5.6618    7.4336 C   0  0  0  0  0  0  0  0  0  0  0  0
    1.5938   -8.9757    2.2692 C   0  0  0  0  0  0  0  0  0  0  0  0
    1.5480   -8.7846    3.7634 C   0  0  0  0  0  0  0  0  0  0  0  0
    2.7639   -9.5011    0.1917 C   0  0  0  0  0  0  0  0  0  0  0  0
    2.7181   -9.3100    1.6858 C   0  0  0  0  0  0  0  0  0  0  0  0
    3.8996   -8.8004   -1.9206 C   0  0  0  0  0  0  0  0  0  0  0  0
    3.8530   -8.6065   -0.4037 C   0  0  0  0  0  0  0  0  0  0  0  0
    5.1705   -7.9481   -3.8465 C   0  0  0  0  0  0  0  0  0  0  0  0
    4.9424   -7.9438   -2.4907 N   0  0  0  0  0  0  0  0  0  0  0  0
    4.4199   -8.7563   -4.6673 N   0  0  0  0  0  0  0  0  0  0  0  0
    6.0983   -7.1860   -4.3537 N   0  0  0  0  0  0  0  0  0  0  0  0
    6.2592   -7.1891   -5.3102 H   0  0  0  0  0  0  0  0  0  0  0  0
    3.7294   -9.3235   -4.2898 H   0  0  0  0  0  0  0  0  0  0  0  0
    1.3662   -4.7447    5.4049 C   0  0  0  0  0  0  0  0  0  0  0  0
    1.7104   -0.1192   -1.7525 C   0  0  0  0  0  0  0  0  0  0  0  0
   -0.4124    1.1303   -1.5856 O   0  0  0  0  0  0  0  0  0  0  0  0
    0.3685    0.3003   -2.2948 C   0  0  0  0  0  0  0  0  0  0  0  0
    2.3920   -1.0593   -2.7488 C   0  0  0  0  0  0  0  0  0  0  0  0
    3.7544   -1.4853   -2.1981 C   0  0  0  0  0  0  0  0  0  0  0  0
    4.4359   -2.4253   -3.1945 C   0  0  0  0  0  0  0  0  0  0  0  0
    5.7983   -2.8513   -2.6438 C   0  0  0  0  0  0  0  0  0  0  0  0
    6.4253   -3.8871   -3.5793 C   0  0  0  0  0  0  0  0  0  0  0  0
    6.7144   -1.6296   -2.5483 C   0  0  0  0  0  0  0  0  0  0  0  0
   -0.0045   -0.1104   -3.3682 O   0  0  0  0  0  0  0  0  0  0  0  0
  1  2  1  0      
  2  3  1  0      
  4  5  1  0      
  5  1  1  0      
  6  7  1  0      
  7  4  1  0      
  8  9  1  0      
  9  6  1  0      
 10 11  1  0      
 11  8  1  0      
 12 13  1  0      
 13 10  1  0      
 14 15  1  0      
 15 12  1  0      
 16 17  1  0      
 17 18  1  0      
 18 14  1  0      
 19 20  1  0      
 20 21  1  0      
 21 22  1  0      
 22 16  1  0      
 23 24  1  0      
 24 19  2  0      
 25 26  1  0      
 26 23  2  0      
 28 25  1  0      
 29 30  1  0      
 30 27  1  0      
 31 32  1  0      
 32 29  2  0      
  3 33  1  0      
 33 34  1  0      
 34 31  2  0      
 16 35  1  0      
  9 36  1  0      
 11 37  1  0      
 13 38  1  0      
 12 39  1  0      
 18 40  1  0      
 17 41  1  0      
 21 42  1  0      
 20 43  1  0      
 26 44  1  0      
 25 45  2  0      
 27 28  1  0      
 30 46  1  0      
 34 47  1  0      
 33 48  1  0      
  2 49  1  0      
 11 50  1  0      
 50 51  1  0      
 51 52  1  0      
 52  9  1  0      
 51 53  1  0      
 50 54  1  0      
  5 55  1  0      
 56 57  1  0      
 57 58  1  0      
 58 59  1  0      
 27 59  1  0      
 60 61  1  0      
 61 56  1  0      
 62 63  1  0      
 63 60  2  0      
 64 65  1  0      
 65 62  1  0      
 66 67  1  0      
 67 64  1  0      
 66 68  1  0      
 66 69  2  0      
 69 70  1  0      
 68 71  1  0      
 58 72  1  0      
 74 75  1  0      
 75 73  1  0      
 73 76  1  0      
 76 77  1  0      
 77 78  1  0      
 78 79  1  0      
 79 80  1  0      
 79 81  1  0      
  7 74  1  0      
 75 82  2  0      
M  END
$$$$
