# Supplementary material for: New Azalomycin F Analogs from Mangrove Streptomyces sp. 211726 with Activity against Microbes and Cancer Cells
Source: MDPI journal article supplement (doi:10.3390/md11030817), 2013-03-12
Supplement: s7 [file s7]

marinedrugs-11-00817-s003.mol
  ChemDraw03251423392D

 82 83  0  0  0  0  0  0  0  0999 V2000
   -4.2847    1.5385    0.0000 C   0  0  0  0  0  0  0  0  0  0  0  0
   -4.2847    0.7135    0.0000 C   0  0  0  0  0  0  0  0  0  0  0  0
   -3.5702    0.3010    0.0000 C   0  0  0  0  0  0  0  0  0  0  0  0
   -2.8558    1.5385    0.0000 C   0  0  0  0  0  0  0  0  0  0  0  0
   -3.5702    1.9510    0.0000 C   0  0  0  0  0  0  0  0  0  0  0  0
   -1.4268    1.5385    0.0000 C   0  0  0  0  0  0  0  0  0  0  0  0
   -2.1413    1.9510    0.0000 C   0  0  0  0  0  0  0  0  0  0  0  0
    0.0021    1.5385    0.0000 O   0  0  0  0  0  0  0  0  0  0  0  0
   -0.7124    1.9510    0.0000 C   0  0  0  0  0  0  0  0  0  0  0  0
    1.4311    1.5385    0.0000 C   0  0  0  0  0  0  0  0  0  0  0  0
    0.7166    1.9510    0.0000 C   0  0  0  0  0  0  0  0  0  0  0  0
    2.8600    1.5385    0.0000 C   0  0  0  0  0  0  0  0  0  0  0  0
    2.1455    1.9510    0.0000 C   0  0  0  0  0  0  0  0  0  0  0  0
    4.2889    1.5385    0.0000 C   0  0  0  0  0  0  0  0  0  0  0  0
    3.5745    1.9510    0.0000 C   0  0  0  0  0  0  0  0  0  0  0  0
    5.7179    0.7135    0.0000 C   0  0  0  0  0  0  0  0  0  0  0  0
    5.7179    1.5385    0.0000 C   0  0  0  0  0  0  0  0  0  0  0  0
    5.0034    1.9510    0.0000 C   0  0  0  0  0  0  0  0  0  0  0  0
    5.0034   -0.5240    0.0000 C   0  0  0  0  0  0  0  0  0  0  0  0
    5.7179   -0.9365    0.0000 C   0  0  0  0  0  0  0  0  0  0  0  0
    6.4324   -0.5240    0.0000 C   0  0  0  0  0  0  0  0  0  0  0  0
    6.4324    0.3010    0.0000 C   0  0  0  0  0  0  0  0  0  0  0  0
    3.5745   -0.5240    0.0000 C   0  0  0  0  0  0  0  0  0  0  0  0
    4.2889   -0.9365    0.0000 C   0  0  0  0  0  0  0  0  0  0  0  0
    2.1455   -0.5240    0.0000 C   0  0  0  0  0  0  0  0  0  0  0  0
    2.8600   -0.9365    0.0000 C   0  0  0  0  0  0  0  0  0  0  0  0
    0.7166   -0.5240    0.0000 C   0  0  0  0  0  0  0  0  0  0  0  0
    1.4311   -0.9365    0.0000 O   0  0  0  0  0  0  0  0  0  0  0  0
   -0.7124   -0.5240    0.0000 C   0  0  0  0  0  0  0  0  0  0  0  0
    0.0021   -0.9365    0.0000 C   0  0  0  0  0  0  0  0  0  0  0  0
   -2.1413   -0.5240    0.0000 C   0  0  0  0  0  0  0  0  0  0  0  0
   -1.4268   -0.9365    0.0000 C   0  0  0  0  0  0  0  0  0  0  0  0
   -3.5702   -0.5240    0.0000 C   0  0  0  0  0  0  0  0  0  0  0  0
   -2.8558   -0.9365    0.0000 C   0  0  0  0  0  0  0  0  0  0  0  0
    5.0034    0.3010    0.0000 O   0  0  0  0  0  0  0  0  0  0  0  0
   -0.7124    1.1260    0.0000 H   0  0  0  0  0  0  0  0  0  0  0  0
    0.7166    1.1260    0.0000 O   0  0  0  0  0  0  0  0  0  0  0  0
    2.1455    2.7760    0.0000 O   0  0  0  0  0  0  0  0  0  0  0  0
    2.8600    0.7135    0.0000 C   0  0  0  0  0  0  0  0  0  0  0  0
    5.0034    2.7760    0.0000 O   0  0  0  0  0  0  0  0  0  0  0  0
    6.4324    1.9510    0.0000 C   0  0  0  0  0  0  0  0  0  0  0  0
    7.1468   -0.9365    0.0000 O   0  0  0  0  0  0  0  0  0  0  0  0
    5.7179   -1.7615    0.0000 C   0  0  0  0  0  0  0  0  0  0  0  0
    2.8600   -1.7615    0.0000 C   0  0  0  0  0  0  0  0  0  0  0  0
    2.1455    0.3010    0.0000 O   0  0  0  0  0  0  0  0  0  0  0  0
    0.0021   -1.7615    0.0000 C   0  0  0  0  0  0  0  0  0  0  0  0
   -2.8558   -1.7615    0.0000 C   0  0  0  0  0  0  0  0  0  0  0  0
   -4.1536   -1.1073    0.0000 O   0  0  0  0  0  0  0  0  0  0  0  0
   -4.8681    0.1302    0.0000 O   0  0  0  0  0  0  0  0  0  0  0  0
    0.7166    2.7760    0.0000 C   0  0  0  0  0  0  0  0  0  0  0  0
    0.0021    3.1885    0.0000 C   0  0  0  0  0  0  0  0  0  0  0  0
   -0.7124    2.7760    0.0000 C   0  0  0  0  0  0  0  0  0  0  0  0
    0.0021    4.0135    0.0000 O   0  0  0  0  0  0  0  0  0  0  0  0
    1.4311    3.1885    0.0000 O   0  0  0  0  0  0  0  0  0  0  0  0
   -3.5702    2.7760    0.0000 O   0  0  0  0  0  0  0  0  0  0  0  0
   -0.7166   -3.1846    0.0000 C   0  0  0  0  0  0  0  0  0  0  0  0
   -0.0021   -3.5971    0.0000 C   0  0  0  0  0  0  0  0  0  0  0  0
    0.7124   -3.1846    0.0000 C   0  0  0  0  0  0  0  0  0  0  0  0
    0.7124   -2.3596    0.0000 C   0  0  0  0  0  0  0  0  0  0  0  0
   -2.1455   -3.1846    0.0000 C   0  0  0  0  0  0  0  0  0  0  0  0
   -1.4311   -3.5971    0.0000 C   0  0  0  0  0  0  0  0  0  0  0  0
   -3.5745   -3.1846    0.0000 C   0  0  0  0  0  0  0  0  0  0  0  0
   -2.8600   -3.5971    0.0000 C   0  0  0  0  0  0  0  0  0  0  0  0
   -5.0034   -3.1846    0.0000 C   0  0  0  0  0  0  0  0  0  0  0  0
   -4.2889   -3.5971    0.0000 C   0  0  0  0  0  0  0  0  0  0  0  0
   -6.4324   -3.1846    0.0000 C   0  0  0  0  0  0  0  0  0  0  0  0
   -5.7179   -3.5971    0.0000 N   0  0  0  0  0  0  0  0  0  0  0  0
   -7.1468   -3.5971    0.0000 N   0  0  0  0  0  0  0  0  0  0  0  0
   -6.4324   -2.3596    0.0000 N   0  0  0  0  0  0  0  0  0  0  0  0
   -7.1468   -1.9471    0.0000 H   0  0  0  0  0  0  0  0  0  0  0  0
   -7.1468   -4.4221    0.0000 H   0  0  0  0  0  0  0  0  0  0  0  0
    1.4268   -3.5971    0.0000 C   0  0  0  0  0  0  0  0  0  0  0  0
   -3.5305    3.1846    0.0000 C   0  0  0  0  0  0  0  0  0  0  0  0
   -2.1015    3.1846    0.0000 O   0  0  0  0  0  0  0  0  0  0  0  0
   -2.8160    3.5971    0.0000 C   0  0  0  0  0  0  0  0  0  0  0  0
   -4.2449    3.5971    0.0000 C   0  0  0  0  0  0  0  0  0  0  0  0
   -4.9594    3.1846    0.0000 C   0  0  0  0  0  0  0  0  0  0  0  0
   -5.6739    3.5971    0.0000 C   0  0  0  0  0  0  0  0  0  0  0  0
   -6.3883    3.1846    0.0000 C   0  0  0  0  0  0  0  0  0  0  0  0
   -6.3883    2.3596    0.0000 C   0  0  0  0  0  0  0  0  0  0  0  0
   -7.1028    3.5971    0.0000 C   0  0  0  0  0  0  0  0  0  0  0  0
   -2.8160    4.4221    0.0000 O   0  0  0  0  0  0  0  0  0  0  0  0
  1  2  1  0      
  2  3  1  0      
  4  5  1  0      
  5  1  1  0      
  6  7  1  0      
  7  4  1  0      
  8  9  1  0      
  9  6  1  0      
 10 11  1  0      
 11  8  1  0      
 12 13  1  0      
 13 10  1  0      
 14 15  1  0      
 15 12  1  0      
 16 17  1  0      
 17 18  1  0      
 18 14  1  0      
 19 20  1  0      
 20 21  1  0      
 21 22  1  0      
 22 16  1  0      
 23 24  1  0      
 24 19  2  0      
 25 26  1  0      
 26 23  2  0      
 28 25  1  0      
 29 30  1  0      
 30 27  1  0      
 31 32  1  0      
 32 29  2  0      
  3 33  1  0      
 33 34  1  0      
 34 31  2  0      
 16 35  1  6      
  9 36  1  6      
 11 37  1  6      
 13 38  1  6      
 12 39  1  6      
 18 40  1  1      
 17 41  1  6      
 21 42  1  6      
 20 43  1  1      
 26 44  1  0      
 25 45  2  0      
 27 28  1  1      
 30 46  1  6      
 34 47  1  0      
 33 48  1  1      
  2 49  1  6      
 11 50  1  0      
 50 51  1  0      
 51 52  1  0      
 52  9  1  0      
 51 53  1  1      
 50 54  1  6      
  5 55  1  1      
 56 57  1  0      
 57 58  1  0      
 58 59  1  0      
 27 59  1  0      
 60 61  1  0      
 61 56  1  0      
 62 63  1  0      
 63 60  2  0      
 64 65  1  0      
 65 62  1  0      
 66 67  1  0      
 67 64  1  0      
 66 68  1  0      
 66 69  2  0      
 69 70  1  0      
 68 71  1  0      
 58 72  1  1      
 74 75  1  0      
 75 73  1  0      
 73 76  1  0      
 76 77  1  0      
 77 78  1  0      
 78 79  1  0      
 79 80  1  0      
 79 81  1  0      
  7 74  1  6      
 75 82  2  0      
M  END
