# Supplementary material for: New Azalomycin F Analogs from Mangrove Streptomyces sp. 211726 with Activity against Microbes and Cancer Cells
Source: MDPI journal article supplement (doi:10.3390/md11030817), 2013-03-12
Supplement: s8 [file s8]

marinedrugs-11-00817-s004.mol
  corina  04161405383D 1   1.00000     0.00000 
CORINA 3.49 0023  12.04.2013
 86 87  0  0  0  0  0  0  0  0999 V2000
   -4.6669    0.0601    0.4342 C   0  0  0  0  0  0  0  0  0  0  0  0
   -4.7006   -1.2953    1.1436 C   0  0  0  0  0  0  0  0  0  0  0  0
   -6.1050   -1.5445    1.6966 C   0  0  0  0  0  0  0  0  0  0  0  0
   -3.2551    1.6415   -0.8925 C   0  0  0  0  0  0  0  0  0  0  0  0
   -3.2998    0.2679   -0.2209 C   0  0  0  0  0  0  0  0  0  0  0  0
   -1.7761    3.1727   -2.2078 C   0  0  0  0  0  0  0  0  0  0  0  0
   -2.0460    1.7155   -1.8268 C   0  0  0  0  0  0  0  0  0  0  0  0
    0.3684    4.1403   -1.6548 O   0  0  0  0  0  0  0  0  0  0  0  0
   -0.3124    3.3337   -2.6196 C   0  0  0  0  0  0  0  0  0  0  0  0
    2.3872    5.1748   -0.8216 C   0  0  0  0  0  0  0  0  0  0  0  0
    1.7572    4.3289   -1.9312 C   0  0  0  0  0  0  0  0  0  0  0  0
    3.5440    4.9794    1.3835 C   0  0  0  0  0  0  0  0  0  0  0  0
    3.2916    4.2922    0.0402 C   0  0  0  0  0  0  0  0  0  0  0  0
    4.5900    4.7258    3.6390 C   0  0  0  0  0  0  0  0  0  0  0  0
    4.3962    4.0693    2.2710 C   0  0  0  0  0  0  0  0  0  0  0  0
    5.1990    2.3355    6.5033 C   0  0  0  0  0  0  0  0  0  0  0  0
    4.8235    3.6905    5.9019 C   0  0  0  0  0  0  0  0  0  0  0  0
    5.4611    3.8261    4.5175 C   0  0  0  0  0  0  0  0  0  0  0  0
    3.5121   -0.6594    9.8861 C   0  0  0  0  0  0  0  0  0  0  0  0
    4.2242    0.6678    9.8336 C   0  0  0  0  0  0  0  0  0  0  0  0
    4.9058    0.8260    8.4727 C   0  0  0  0  0  0  0  0  0  0  0  0
    4.5359    2.1846    7.8736 C   0  0  0  0  0  0  0  0  0  0  0  0
    1.4898   -1.9918    9.9640 C   0  0  0  0  0  0  0  0  0  0  0  0
    2.1787   -0.7024    9.9156 C   0  0  0  0  0  0  0  0  0  0  0  0
   -0.5243   -3.2951    9.9107 C   0  0  0  0  0  0  0  0  0  0  0  0
    0.1413   -2.0445    9.8699 C   0  0  0  0  0  0  0  0  0  0  0  0
   -2.2273   -3.8083    8.3557 C   0  0  0  0  0  0  0  0  0  0  0  0
   -1.8500   -3.3671    9.6620 O   0  0  0  0  0  0  0  0  0  0  0  0
   -4.1228   -4.0844    6.7855 C   0  0  0  0  0  0  0  0  0  0  0  0
   -3.7505   -3.7915    8.2161 C   0  0  0  0  0  0  0  0  0  0  0  0
   -5.1576   -3.4808    4.6761 C   0  0  0  0  0  0  0  0  0  0  0  0
   -4.8022   -3.1908    6.0757 C   0  0  0  0  0  0  0  0  0  0  0  0
   -6.1195   -2.8429    2.5059 C   0  0  0  0  0  0  0  0  0  0  0  0
   -5.7526   -2.5512    3.9372 C   0  0  0  0  0  0  0  0  0  0  0  0
    6.6183    2.2562    6.6496 O   0  0  0  0  0  0  0  0  0  0  0  0
    0.1621    2.3539   -2.6717 H   0  0  0  0  0  0  0  0  0  0  0  0
    2.4088    3.0584   -1.9878 O   0  0  0  0  0  0  0  0  0  0  0  0
    2.6559    3.0317    0.2620 O   0  0  0  0  0  0  0  0  0  0  0  0
    2.2068    5.2573    2.0732 C   0  0  0  0  0  0  0  0  0  0  0  0
    6.7621    4.4028    4.6470 O   0  0  0  0  0  0  0  0  0  0  0  0
    5.3334    4.8108    6.8106 C   0  0  0  0  0  0  0  0  0  0  0  0
    4.4694   -0.2157    7.5972 O   0  0  0  0  0  0  0  0  0  0  0  0
    3.2122    1.7981   10.0318 C   0  0  0  0  0  0  0  0  0  0  0  0
   -0.6527   -0.7718    9.7240 C   0  0  0  0  0  0  0  0  0  0  0  0
    0.1001   -4.3064   10.1699 O   0  0  0  0  0  0  0  0  0  0  0  0
   -4.3590   -4.8566    9.1305 C   0  0  0  0  0  0  0  0  0  0  0  0
   -6.0575   -1.2005    4.5335 C   0  0  0  0  0  0  0  0  0  0  0  0
   -7.4263   -3.4190    2.4577 O   0  0  0  0  0  0  0  0  0  0  0  0
   -3.7585   -1.2944    2.2181 O   0  0  0  0  0  0  0  0  0  0  0  0
    1.9184    5.0459   -3.2722 C   0  0  0  0  0  0  0  0  0  0  0  0
    1.2264    4.2366   -4.3706 C   0  0  0  0  0  0  0  0  0  0  0  0
   -0.2386    4.0090   -3.9915 C   0  0  0  0  0  0  0  0  0  0  0  0
    1.2930    4.9543   -5.6045 O   0  0  0  0  0  0  0  0  0  0  0  0
    3.3081    5.1746   -3.5793 O   0  0  0  0  0  0  0  0  0  0  0  0
   -3.0829   -0.7484   -1.2017 O   0  0  0  0  0  0  0  0  0  0  0  0
   -1.3142   -7.2789    4.8982 C   0  0  0  0  0  0  0  0  0  0  0  0
   -1.3125   -6.9871    6.4002 C   0  0  0  0  0  0  0  0  0  0  0  0
   -1.5908   -5.5005    6.6313 C   0  0  0  0  0  0  0  0  0  0  0  0
   -1.7128   -5.2319    8.1325 C   0  0  0  0  0  0  0  0  0  0  0  0
   -1.0376   -9.0528    3.1878 C   0  0  0  0  0  0  0  0  0  0  0  0
   -1.0359   -8.7655    4.6671 C   0  0  0  0  0  0  0  0  0  0  0  0
   -0.0024   -9.9156    1.1518 C   0  0  0  0  0  0  0  0  0  0  0  0
   -0.0007   -9.6283    2.6311 C   0  0  0  0  0  0  0  0  0  0  0  0
    1.2299   -9.5724   -0.9944 C   0  0  0  0  0  0  0  0  0  0  0  0
    1.2316   -9.2807    0.5076 C   0  0  0  0  0  0  0  0  0  0  0  0
    2.6250   -9.0947   -2.9631 C   0  0  0  0  0  0  0  0  0  0  0  0
    2.4115   -8.9645   -1.6112 N   0  0  0  0  0  0  0  0  0  0  0  0
    1.7297   -9.7955   -3.7361 N   0  0  0  0  0  0  0  0  0  0  0  0
    3.6763   -8.5539   -3.5120 N   0  0  0  0  0  0  0  0  0  0  0  0
    3.9038   -8.6926   -4.9525 C   0  0  0  0  0  0  0  0  0  0  0  0
   -0.4408   -4.6710    6.0565 C   0  0  0  0  0  0  0  0  0  0  0  0
    1.0530   -0.3652   -1.1919 C   0  0  0  0  0  0  0  0  0  0  0  0
   -0.8814    1.1686   -1.1539 O   0  0  0  0  0  0  0  0  0  0  0  0
   -0.2157    0.1896   -1.7866 C   0  0  0  0  0  0  0  0  0  0  0  0
    1.6073   -1.4611   -2.1044 C   0  0  0  0  0  0  0  0  0  0  0  0
    2.8953   -2.0243   -1.5006 C   0  0  0  0  0  0  0  0  0  0  0  0
    3.4496   -3.1202   -2.4131 C   0  0  0  0  0  0  0  0  0  0  0  0
    4.7377   -3.6835   -1.8094 C   0  0  0  0  0  0  0  0  0  0  0  0
    5.2919   -4.7794   -2.7219 C   0  0  0  0  0  0  0  0  0  0  0  0
   -0.6337   -0.2467   -2.8329 O   0  0  0  0  0  0  0  0  0  0  0  0
    6.5800   -5.3427   -2.1181 C   0  0  0  0  0  0  0  0  0  0  0  0
    7.1343   -6.4386   -3.0307 C   0  0  0  0  0  0  0  0  0  0  0  0
    7.5492   -5.8258   -4.3698 C   0  0  0  0  0  0  0  0  0  0  0  0
    8.3168   -5.0705   -4.2014 H   0  0  0  0  0  0  0  0  0  0  0  0
    8.3512   -7.0872   -2.3677 C   0  0  0  0  0  0  0  0  0  0  0  0
    7.9440   -6.6065   -5.0199 H   0  0  0  0  0  0  0  0  0  0  0  0
  1  2  1  0      
  2  3  1  0      
  4  5  1  0      
  5  1  1  0      
  6  7  1  0      
  7  4  1  0      
  8  9  1  0      
  9  6  1  0      
 10 11  1  0      
 11  8  1  0      
 12 13  1  0      
 13 10  1  0      
 14 15  1  0      
 15 12  1  0      
 16 17  1  0      
 17 18  1  0      
 18 14  1  0      
 19 20  1  0      
 20 21  1  0      
 21 22  1  0      
 22 16  1  0      
 23 24  1  0      
 24 19  2  0      
 25 26  1  0      
 26 23  2  0      
 28 25  1  0      
 29 30  1  0      
 30 27  1  0      
 31 32  1  0      
 32 29  2  0      
  3 33  1  0      
 33 34  1  0      
 34 31  2  0      
 16 35  1  0      
  9 36  1  0      
 11 37  1  0      
 13 38  1  0      
 12 39  1  0      
 18 40  1  0      
 17 41  1  0      
 21 42  1  0      
 20 43  1  0      
 26 44  1  0      
 25 45  2  0      
 27 28  1  0      
 30 46  1  0      
 34 47  1  0      
 33 48  1  0      
  2 49  1  0      
 11 50  1  0      
 50 51  1  0      
 51 52  1  0      
 52  9  1  0      
 51 53  1  0      
 50 54  1  0      
  5 55  1  0      
 56 57  1  0      
 57 58  1  0      
 58 59  1  0      
 27 59  1  0      
 60 61  1  0      
 61 56  1  0      
 62 63  1  0      
 63 60  2  0      
 64 65  1  0      
 65 62  1  0      
 66 67  1  0      
 67 64  1  0      
 66 68  1  0      
 66 69  2  0      
 69 70  1  0      
 58 71  1  0      
 73 74  1  0      
 74 72  1  0      
 72 75  1  0      
 75 76  1  0      
 76 77  1  0      
 77 78  1  0      
 78 79  1  0      
  7 73  1  0      
 74 80  2  0      
 79 81  1  0      
 81 82  1  0      
 82 83  1  0      
 83 84  1  0      
 82 85  1  0      
 83 86  1  0      
M  END
$$$$
