# Supplementary material for: New Azalomycin F Analogs from Mangrove Streptomyces sp. 211726 with Activity against Microbes and Cancer Cells
Source: MDPI journal article supplement (doi:10.3390/md11030817), 2013-03-12
Supplement: s9 [file s9]

marinedrugs-11-00817-s004.mol
  ChemDraw03251423402D

 86 87  0  0  0  0  0  0  0  0999 V2000
   -2.8778    1.1260    0.0000 C   0  0  0  0  0  0  0  0  0  0  0  0
   -2.8778    0.3010    0.0000 C   0  0  0  0  0  0  0  0  0  0  0  0
   -2.1633   -0.1115    0.0000 C   0  0  0  0  0  0  0  0  0  0  0  0
   -1.4488    1.1260    0.0000 C   0  0  0  0  0  0  0  0  0  0  0  0
   -2.1633    1.5385    0.0000 C   0  0  0  0  0  0  0  0  0  0  0  0
   -0.0199    1.1260    0.0000 C   0  0  0  0  0  0  0  0  0  0  0  0
   -0.7344    1.5385    0.0000 C   0  0  0  0  0  0  0  0  0  0  0  0
    1.4090    1.1260    0.0000 O   0  0  0  0  0  0  0  0  0  0  0  0
    0.6946    1.5385    0.0000 C   0  0  0  0  0  0  0  0  0  0  0  0
    2.8380    1.1260    0.0000 C   0  0  0  0  0  0  0  0  0  0  0  0
    2.1235    1.5385    0.0000 C   0  0  0  0  0  0  0  0  0  0  0  0
    4.2669    1.1260    0.0000 C   0  0  0  0  0  0  0  0  0  0  0  0
    3.5525    1.5385    0.0000 C   0  0  0  0  0  0  0  0  0  0  0  0
    5.6959    1.1260    0.0000 C   0  0  0  0  0  0  0  0  0  0  0  0
    4.9814    1.5385    0.0000 C   0  0  0  0  0  0  0  0  0  0  0  0
    7.1248    0.3010    0.0000 C   0  0  0  0  0  0  0  0  0  0  0  0
    7.1248    1.1260    0.0000 C   0  0  0  0  0  0  0  0  0  0  0  0
    6.4103    1.5385    0.0000 C   0  0  0  0  0  0  0  0  0  0  0  0
    6.4103   -0.9365    0.0000 C   0  0  0  0  0  0  0  0  0  0  0  0
    7.1248   -1.3490    0.0000 C   0  0  0  0  0  0  0  0  0  0  0  0
    7.8393   -0.9365    0.0000 C   0  0  0  0  0  0  0  0  0  0  0  0
    7.8393   -0.1115    0.0000 C   0  0  0  0  0  0  0  0  0  0  0  0
    4.9814   -0.9365    0.0000 C   0  0  0  0  0  0  0  0  0  0  0  0
    5.6959   -1.3490    0.0000 C   0  0  0  0  0  0  0  0  0  0  0  0
    3.5525   -0.9365    0.0000 C   0  0  0  0  0  0  0  0  0  0  0  0
    4.2669   -1.3490    0.0000 C   0  0  0  0  0  0  0  0  0  0  0  0
    2.1235   -0.9365    0.0000 C   0  0  0  0  0  0  0  0  0  0  0  0
    2.8380   -1.3490    0.0000 O   0  0  0  0  0  0  0  0  0  0  0  0
    0.6946   -0.9365    0.0000 C   0  0  0  0  0  0  0  0  0  0  0  0
    1.4090   -1.3490    0.0000 C   0  0  0  0  0  0  0  0  0  0  0  0
   -0.7344   -0.9365    0.0000 C   0  0  0  0  0  0  0  0  0  0  0  0
   -0.0199   -1.3490    0.0000 C   0  0  0  0  0  0  0  0  0  0  0  0
   -2.1633   -0.9365    0.0000 C   0  0  0  0  0  0  0  0  0  0  0  0
   -1.4488   -1.3490    0.0000 C   0  0  0  0  0  0  0  0  0  0  0  0
    6.4103   -0.1115    0.0000 O   0  0  0  0  0  0  0  0  0  0  0  0
    0.6946    0.7135    0.0000 H   0  0  0  0  0  0  0  0  0  0  0  0
    2.1235    0.7135    0.0000 O   0  0  0  0  0  0  0  0  0  0  0  0
    3.5525    2.3635    0.0000 O   0  0  0  0  0  0  0  0  0  0  0  0
    4.2669    0.3010    0.0000 C   0  0  0  0  0  0  0  0  0  0  0  0
    6.4103    2.3635    0.0000 O   0  0  0  0  0  0  0  0  0  0  0  0
    7.8393    1.5385    0.0000 C   0  0  0  0  0  0  0  0  0  0  0  0
    8.5538   -1.3490    0.0000 O   0  0  0  0  0  0  0  0  0  0  0  0
    7.1248   -2.1740    0.0000 C   0  0  0  0  0  0  0  0  0  0  0  0
    4.2669   -2.1740    0.0000 C   0  0  0  0  0  0  0  0  0  0  0  0
    3.5525   -0.1115    0.0000 O   0  0  0  0  0  0  0  0  0  0  0  0
    1.4090   -2.1740    0.0000 C   0  0  0  0  0  0  0  0  0  0  0  0
   -1.4488   -2.1740    0.0000 C   0  0  0  0  0  0  0  0  0  0  0  0
   -2.7467   -1.5198    0.0000 O   0  0  0  0  0  0  0  0  0  0  0  0
   -3.4611   -0.2823    0.0000 O   0  0  0  0  0  0  0  0  0  0  0  0
    2.1235    2.3635    0.0000 C   0  0  0  0  0  0  0  0  0  0  0  0
    1.4090    2.7760    0.0000 C   0  0  0  0  0  0  0  0  0  0  0  0
    0.6946    2.3635    0.0000 C   0  0  0  0  0  0  0  0  0  0  0  0
    1.4090    3.6010    0.0000 O   0  0  0  0  0  0  0  0  0  0  0  0
    2.8380    2.7760    0.0000 O   0  0  0  0  0  0  0  0  0  0  0  0
   -2.1633    2.3635    0.0000 O   0  0  0  0  0  0  0  0  0  0  0  0
    0.6903   -3.5971    0.0000 C   0  0  0  0  0  0  0  0  0  0  0  0
    1.4048   -4.0096    0.0000 C   0  0  0  0  0  0  0  0  0  0  0  0
    2.1193   -3.5971    0.0000 C   0  0  0  0  0  0  0  0  0  0  0  0
    2.1193   -2.7721    0.0000 C   0  0  0  0  0  0  0  0  0  0  0  0
   -0.7386   -3.5971    0.0000 C   0  0  0  0  0  0  0  0  0  0  0  0
   -0.0241   -4.0096    0.0000 C   0  0  0  0  0  0  0  0  0  0  0  0
   -2.1675   -3.5971    0.0000 C   0  0  0  0  0  0  0  0  0  0  0  0
   -1.4531   -4.0096    0.0000 C   0  0  0  0  0  0  0  0  0  0  0  0
   -3.5965   -3.5971    0.0000 C   0  0  0  0  0  0  0  0  0  0  0  0
   -2.8820   -4.0096    0.0000 C   0  0  0  0  0  0  0  0  0  0  0  0
   -5.0254   -3.5971    0.0000 C   0  0  0  0  0  0  0  0  0  0  0  0
   -4.3110   -4.0096    0.0000 N   0  0  0  0  0  0  0  0  0  0  0  0
   -5.7399   -4.0096    0.0000 N   0  0  0  0  0  0  0  0  0  0  0  0
   -5.0254   -2.7721    0.0000 N   0  0  0  0  0  0  0  0  0  0  0  0
   -5.7399   -2.3596    0.0000 C   0  0  0  0  0  0  0  0  0  0  0  0
    2.8338   -4.0096    0.0000 C   0  0  0  0  0  0  0  0  0  0  0  0
   -2.1235    2.7721    0.0000 C   0  0  0  0  0  0  0  0  0  0  0  0
   -0.6946    2.7721    0.0000 O   0  0  0  0  0  0  0  0  0  0  0  0
   -1.4090    3.1846    0.0000 C   0  0  0  0  0  0  0  0  0  0  0  0
   -2.8380    3.1846    0.0000 C   0  0  0  0  0  0  0  0  0  0  0  0
   -3.5525    2.7721    0.0000 C   0  0  0  0  0  0  0  0  0  0  0  0
   -4.2669    3.1846    0.0000 C   0  0  0  0  0  0  0  0  0  0  0  0
   -4.9814    2.7721    0.0000 C   0  0  0  0  0  0  0  0  0  0  0  0
   -5.6959    3.1846    0.0000 C   0  0  0  0  0  0  0  0  0  0  0  0
   -1.4090    4.0096    0.0000 O   0  0  0  0  0  0  0  0  0  0  0  0
   -6.4103    2.7721    0.0000 C   0  0  0  0  0  0  0  0  0  0  0  0
   -7.1248    3.1846    0.0000 C   0  0  0  0  0  0  0  0  0  0  0  0
   -7.8393    2.7721    0.0000 C   0  0  0  0  0  0  0  0  0  0  0  0
   -8.5538    3.1846    0.0000 H   0  0  0  0  0  0  0  0  0  0  0  0
   -7.1248    4.0096    0.0000 C   0  0  0  0  0  0  0  0  0  0  0  0
   -7.8393    1.9471    0.0000 H   0  0  0  0  0  0  0  0  0  0  0  0
  1  2  1  0      
  2  3  1  0      
  4  5  1  0      
  5  1  1  0      
  6  7  1  0      
  7  4  1  0      
  8  9  1  0      
  9  6  1  0      
 10 11  1  0      
 11  8  1  0      
 12 13  1  0      
 13 10  1  0      
 14 15  1  0      
 15 12  1  0      
 16 17  1  0      
 17 18  1  0      
 18 14  1  0      
 19 20  1  0      
 20 21  1  0      
 21 22  1  0      
 22 16  1  0      
 23 24  1  0      
 24 19  2  0      
 25 26  1  0      
 26 23  2  0      
 28 25  1  0      
 29 30  1  0      
 30 27  1  0      
 31 32  1  0      
 32 29  2  0      
  3 33  1  0      
 33 34  1  0      
 34 31  2  0      
 16 35  1  6      
  9 36  1  6      
 11 37  1  6      
 13 38  1  6      
 12 39  1  6      
 18 40  1  1      
 17 41  1  6      
 21 42  1  6      
 20 43  1  1      
 26 44  1  0      
 25 45  2  0      
 27 28  1  1      
 30 46  1  6      
 34 47  1  0      
 33 48  1  1      
  2 49  1  6      
 11 50  1  0      
 50 51  1  0      
 51 52  1  0      
 52  9  1  0      
 51 53  1  1      
 50 54  1  6      
  5 55  1  1      
 56 57  1  0      
 57 58  1  0      
 58 59  1  0      
 27 59  1  0      
 60 61  1  0      
 61 56  1  0      
 62 63  1  0      
 63 60  2  0      
 64 65  1  0      
 65 62  1  0      
 66 67  1  0      
 67 64  1  0      
 66 68  1  0      
 66 69  2  0      
 69 70  1  0      
 58 71  1  1      
 73 74  1  0      
 74 72  1  0      
 72 75  1  0      
 75 76  1  0      
 76 77  1  0      
 77 78  1  0      
 78 79  1  0      
  7 73  1  6      
 74 80  2  0      
 79 81  1  0      
 81 82  1  0      
 82 83  1  0      
 83 84  1  0      
 82 85  1  0      
 83 86  1  0      
M  END
